# Supplementary material
Source: publisher site journal article supplement (https://www.dovepress.com/article/258439)
Supplement: Supplementary file 1 [file get_supplementary_file.php]

# Supplementary Figure 1

## A Normal

FAM171A1

| Breast                                  |                          |
|-----------------------------------------|--------------------------|
| HPA051345                               |                          |
| Female, age 45                          | Breast (T-04000)         |
| Normal tissue, NOS                      | (M-00100)                |
| Patient id: 3544                        |                          |
| Adipocytes                              |                          |
| Staining: Not detected                  |                          |
| Intensity: <b>Negative</b>              | Quantity: <b>None</b>    |
| Location: <b>None</b>                   |                          |
| Glandular cells                         |                          |
| Staining: <b>Medium</b>                 |                          |
| Intensity: <b>Moderate</b>              | Quantity: <b>&gt;75%</b> |
| Location: <b>Cytoplasmic membranous</b> |                          |
| Myoepithelial cells                     |                          |
| Staining: <b>Medium</b>                 |                          |
| Intensity: <b>Moderate</b>              | Quantity: <b>&gt;75%</b> |
| Location: <b>Cytoplasmic membranous</b> |                          |

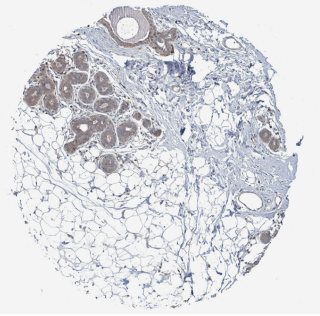

## Cancer

| Breast cancer                           |                          |
|-----------------------------------------|--------------------------|
| HPA051345                               |                          |
| Female, age 73                          | Breast (T-04000)         |
| Duct carcinoma (M-85003)                |                          |
| Patient id: 2115                        |                          |
| Tumor cells                             |                          |
| Staining: <b>Low</b>                    |                          |
| Intensity: <b>Weak</b>                  | Quantity: <b>75%-25%</b> |
| Location: <b>Cytoplasmic membranous</b> |                          |

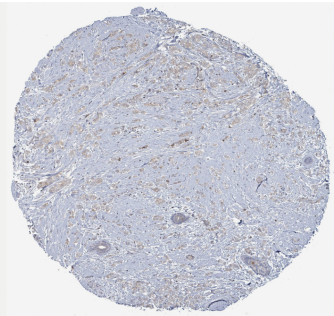

## B Normal

NDFIP1

| Breast                                  |                          |
|-----------------------------------------|--------------------------|
| HPA09682                                |                          |
| Female, age 23                          | Breast (T-04000)         |
| Normal tissue, NOS                      | (M-00100)                |
| Patient id: 2773                        |                          |
| Adipocytes                              |                          |
| Staining: Not detected                  |                          |
| Intensity: <b>Negative</b>              | Quantity: <b>None</b>    |
| Location: <b>None</b>                   |                          |
| Glandular cells                         |                          |
| Staining: <b>Medium</b>                 |                          |
| Intensity: <b>Moderate</b>              | Quantity: <b>&gt;75%</b> |
| Location: <b>Cytoplasmic membranous</b> |                          |
| Myoepithelial cells                     |                          |
| Staining: <b>High</b>                   |                          |
| Intensity: <b>Strong</b>                | Quantity: <b>&gt;75%</b> |
| Location: <b>Cytoplasmic membranous</b> |                          |

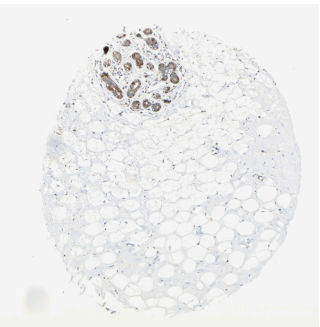

## Cancer

| Breast cancer                           |                          |
|-----------------------------------------|--------------------------|
| HPA09682                                |                          |
| Female, age 51                          | Breast (T-04000)         |
| Lobular carcinoma (M-85203)             |                          |
| Patient id: 2083                        |                          |
| Tumor cells                             |                          |
| Staining: <b>Low</b>                    |                          |
| Intensity: <b>Weak</b>                  | Quantity: <b>75%-25%</b> |
| Location: <b>Cytoplasmic membranous</b> |                          |

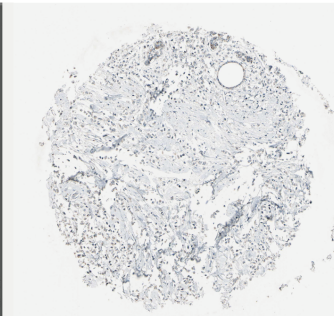

## C Normal

SKP1

| Breast                                          |                          |
|-------------------------------------------------|--------------------------|
| CAB012982                                       |                          |
| Female, age 23                                  | Breast (T-04000)         |
| Normal tissue, NOS                              | (M-00100)                |
| Patient id: 2773                                |                          |
| Adipocytes                                      |                          |
| Staining: <b>Low</b>                            |                          |
| Intensity: <b>Weak</b>                          | Quantity: <b>75%-25%</b> |
| Location: <b>Nuclear</b>                        |                          |
| Glandular cells                                 |                          |
| Staining: <b>High</b>                           |                          |
| Intensity: <b>Strong</b>                        | Quantity: <b>&gt;75%</b> |
| Location: <b>Cytoplasmic membranous nuclear</b> |                          |
| Myoepithelial cells                             |                          |
| Staining: <b>Medium</b>                         |                          |
| Intensity: <b>Moderate</b>                      | Quantity: <b>&gt;75%</b> |
| Location: <b>Cytoplasmic membranous nuclear</b> |                          |

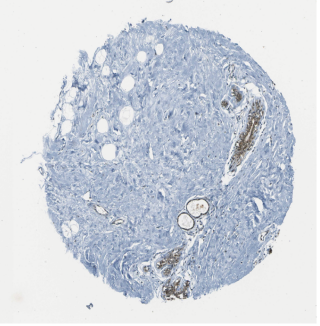

## Cancer

| Breast cancer                                   |                          |
|-------------------------------------------------|--------------------------|
| CAB012982                                       |                          |
| Female, age 51                                  | Breast (T-04000)         |
| Lobular carcinoma (M-85203)                     |                          |
| Patient id: 2083                                |                          |
| Tumor cells                                     |                          |
| Staining: <b>Low</b>                            |                          |
| Intensity: <b>Weak</b>                          | Quantity: <b>&gt;75%</b> |
| Location: <b>Cytoplasmic membranous nuclear</b> |                          |

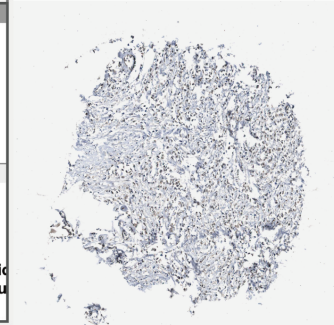

## D Normal

REEP5

| Breast                                  |                          |
|-----------------------------------------|--------------------------|
| HPA03895                                |                          |
| Female, age 23                          | Breast (T-04000)         |
| Normal tissue, NOS                      | (M-00100)                |
| Patient id: 2773                        |                          |
| Adipocytes                              |                          |
| Staining: Not detected                  |                          |
| Intensity: <b>Negative</b>              | Quantity: <b>None</b>    |
| Location: <b>None</b>                   |                          |
| Glandular cells                         |                          |
| Staining: <b>Low</b>                    |                          |
| Intensity: <b>Weak</b>                  | Quantity: <b>75%-25%</b> |
| Location: <b>Cytoplasmic membranous</b> |                          |
| Myoepithelial cells                     |                          |
| Staining: Not detected                  |                          |
| Intensity: <b>Negative</b>              | Quantity: <b>None</b>    |
| Location: <b>None</b>                   |                          |

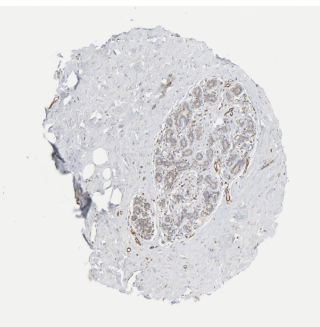

## Cancer

| Breast cancer                           |                          |
|-----------------------------------------|--------------------------|
| HPA03895                                |                          |
| Female, age 49                          | Breast (T-04000)         |
| Duct carcinoma (M-85003)                |                          |
| Normal tissue, NOS                      | (M-00100)                |
| Patient id: 2015                        |                          |
| Tumor cells                             |                          |
| Staining: <b>Low</b>                    |                          |
| Intensity: <b>Weak</b>                  | Quantity: <b>&gt;75%</b> |
| Location: <b>Cytoplasmic membranous</b> |                          |

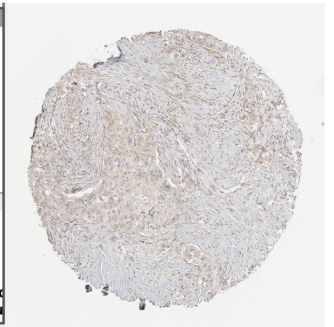

## Supplementary Figure 2

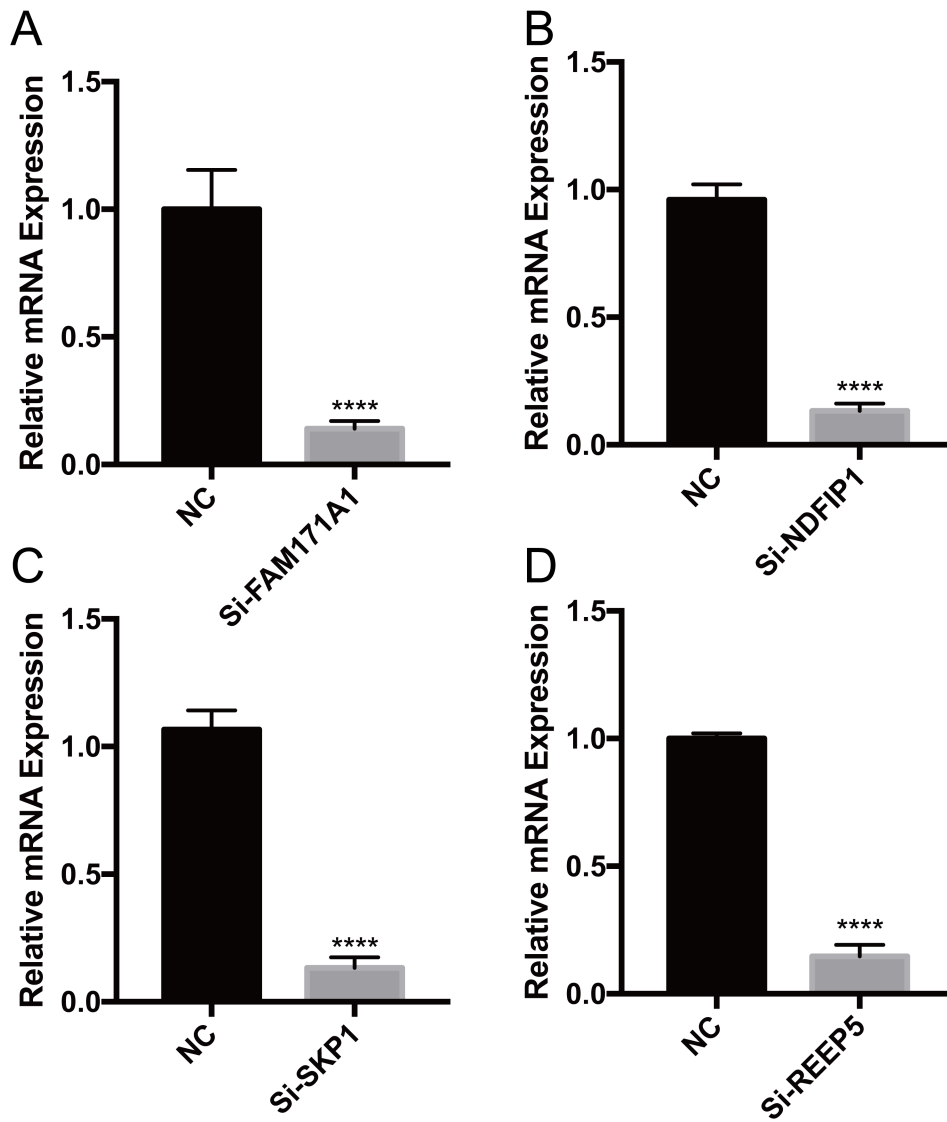

Supplementary Figure 3

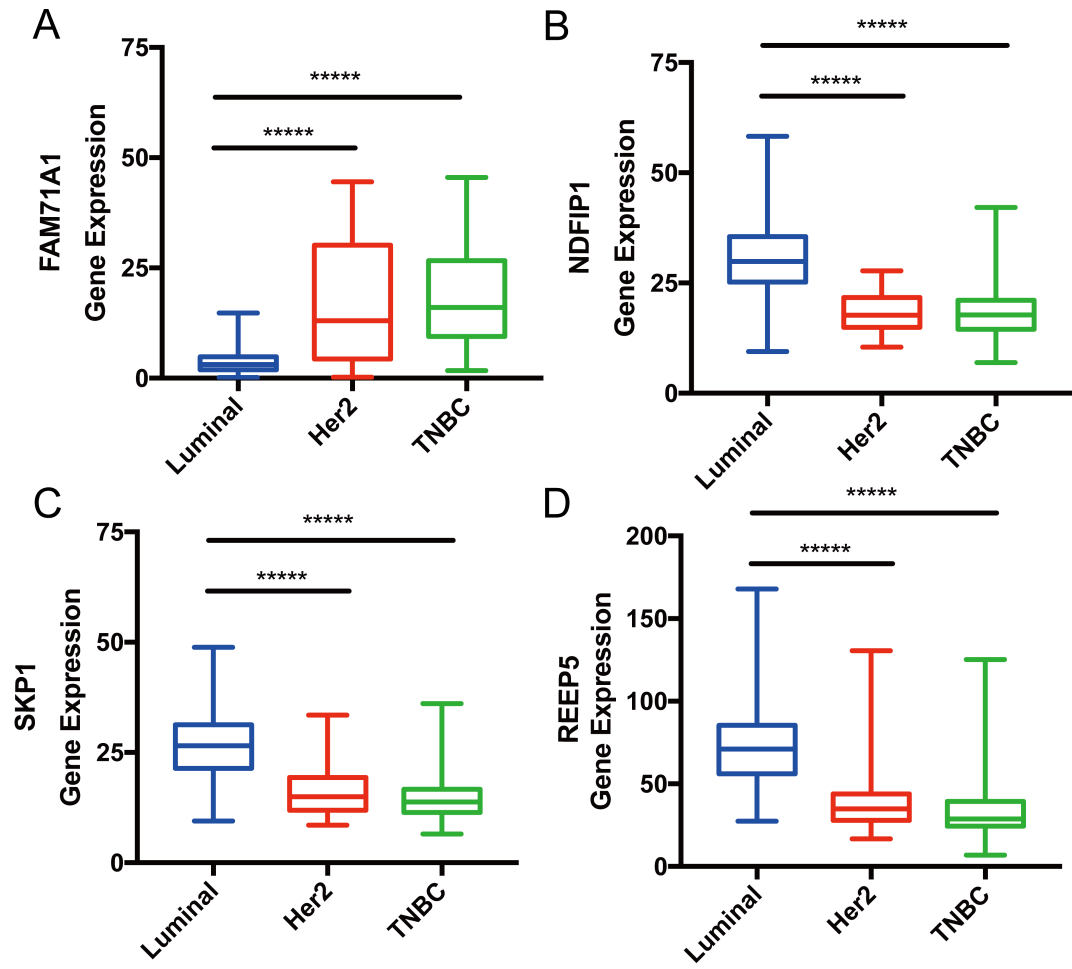

# Supplementary Figure 4

A

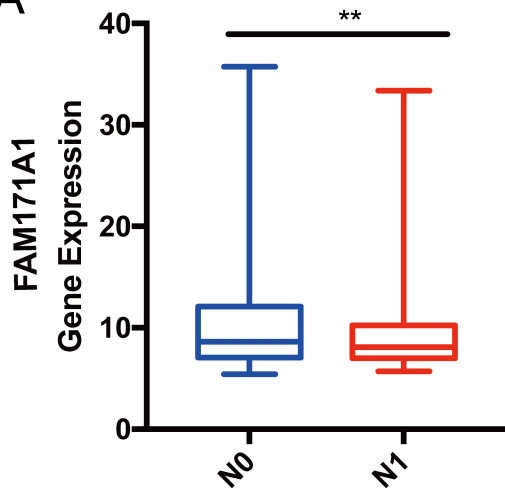

B

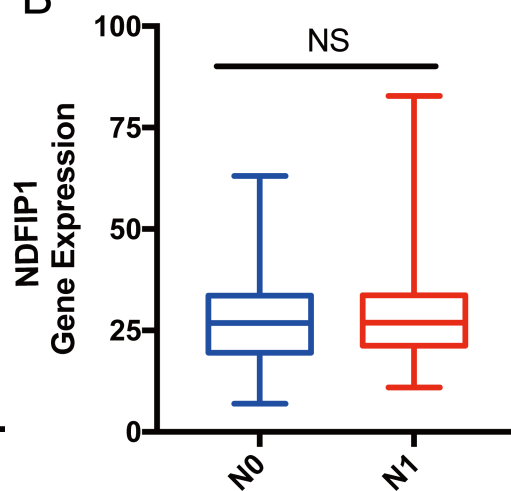

C

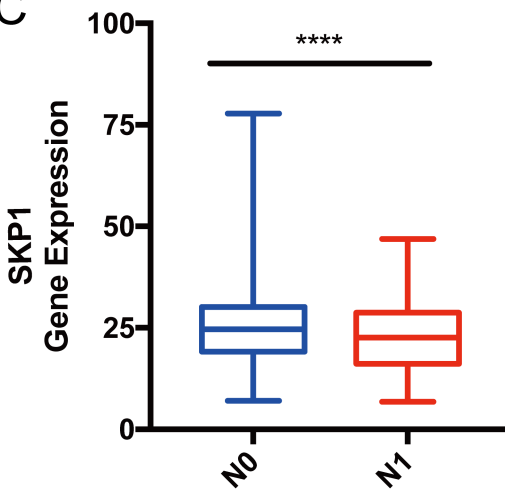

D

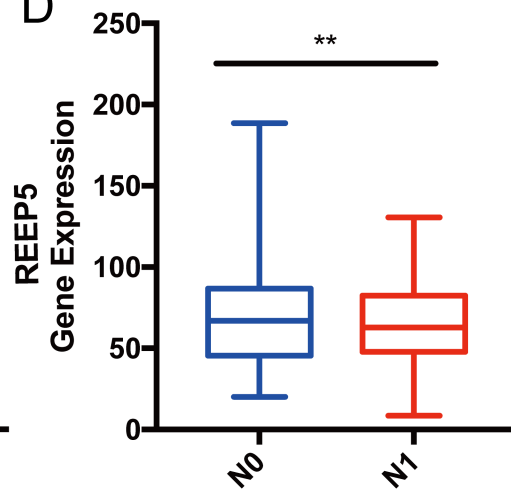

Supplementary Table 1.

Statistics of clinical features and molecular characteristics

---

| <b>Clinical features and molecular characteristics (cases)</b> |          |    |
|----------------------------------------------------------------|----------|----|
| <b>ER<math>\alpha</math></b>                                   | <b>+</b> | 25 |
|                                                                | <b>-</b> | 15 |
| <b>PR</b>                                                      | <b>+</b> | 21 |
|                                                                | <b>-</b> | 19 |
| <b>HER2</b>                                                    | <b>+</b> | 22 |
|                                                                | <b>-</b> | 18 |
| <b>Lymph node metastasis</b>                                   | <b>+</b> | 20 |
|                                                                | <b>-</b> | 20 |
| <b>Pathological grade</b>                                      | Low      | 1  |
|                                                                | Medium   | 24 |
|                                                                | High     | 15 |

---

Supplementary Table 2. Primer sequences used to amplify target genes in human by real-time RT-PCR.

| Target Gene | Primer Sequence                |
|-------------|--------------------------------|
| FAM171A1    |                                |
| forward     | 5'- GCAGATGCGCTCATCGAGAT-3'    |
| reverse     | 5'- GCCCAGCTTATACTGGAACTTG-3'  |
| NDFIP1      |                                |
| forward     | 5'- TACAACACTGCCAGTTATGATG -3' |
| reverse     | 5'- ATCCCGACCCACAAAATCCTC-3'   |
| SKP1        |                                |
| forward     | 5'- GACCATGTTGGAAGATTTGGGA-3'  |
| reverse     | 5'- TGCACCACTGAATGACCTTTT-3'   |
| REEP5       |                                |
| forward     | 5'- AAGAACTGCATGACTGACCTTC-3'  |
| reverse     | 5'- GAGGCTCCATAACCGAACACC-3'   |
| CIRBP       |                                |
| forward     | 5'- AGGGCTGAGTTTTGACACCAA-3'   |
| reverse     | 5'- ACAAACCCAAATCCCCGAGAT-3'   |
| BTF3        |                                |
| forward     | 5'- CCAAGGAACAGTGATCCACTTT-3'  |
| reverse     | 5'- AGCTGCTTTGTCTCAGCATGG-3'   |
| TBC1D9      |                                |
| forward     | 5'- CTGTGGATCACCGAGAGGG-3'     |
| reverse     | 5'- ACAGGCGATGGTCCAGTAGA-3'    |
| GAPDH       |                                |
| forward     | 5'-GAAGGTGAAGGTCGGAGTC-3'      |
| reverse     | 5'-GAAGATGGTGATGGGATTTC-3'     |
